# Supplementary material for: Layered Ni(ii)-Zn(ii) hydroxyacetates. Anion exchange and thermal decomposition of the hydroxysalts obtainedElectronic supplementary information (ESI): PXRD and FTIR of all four NiZn samples; PXRD of calcined chloride, bromide, carbonate and nitrate samples. See http://www.rsc.org/suppdata/jm/b1/b110145e
Source: Royal Society of Chemistry journal article supplement (doi:10.1039/b110145e), 2002-02-21

### Powder X-ray diffraction patterns of all four NiZn samples

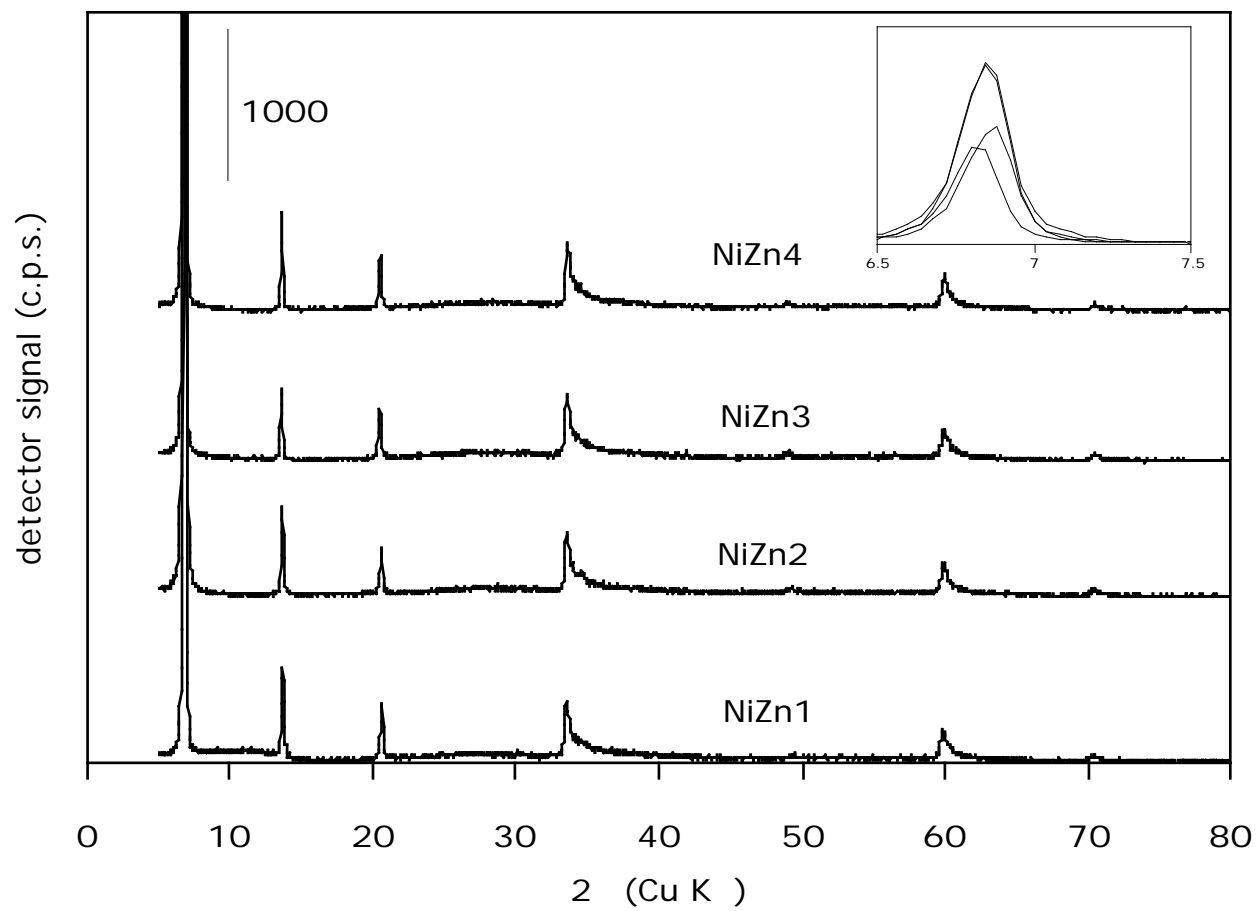

## FT-IR spectra of all four NiZn samples

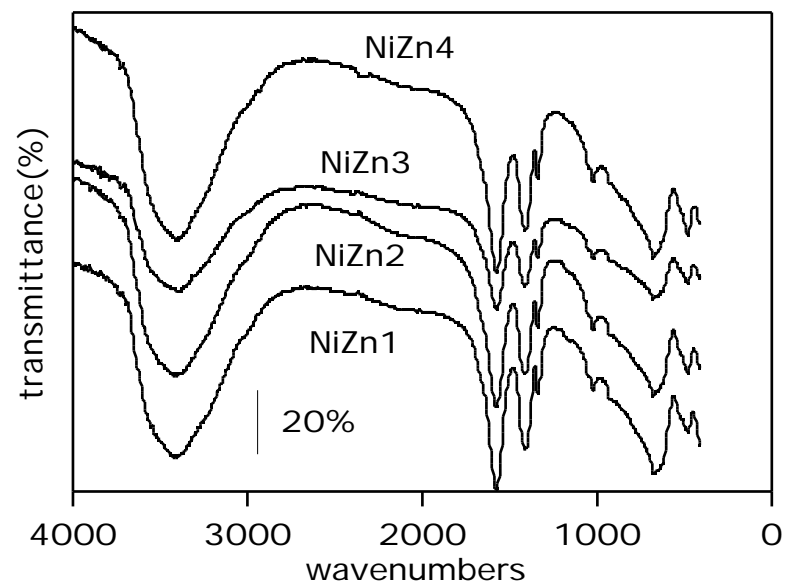

## Powder X-ray diffraction patterns of calcined chloride sample

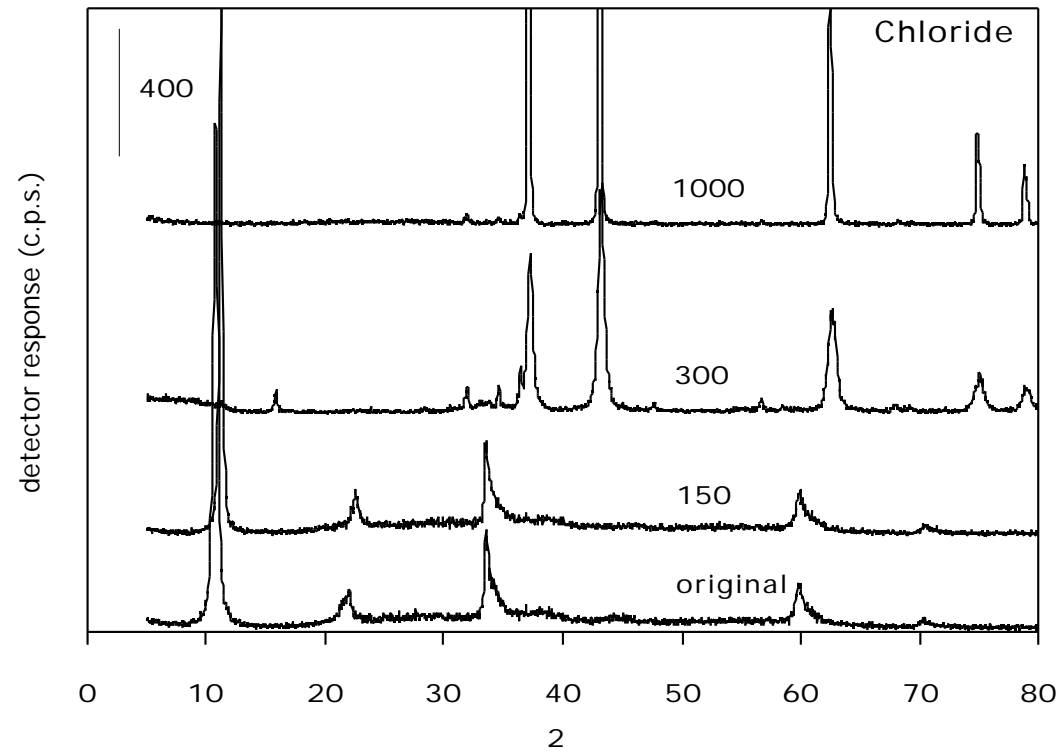

## Powder X-ray diffraction patterns of calcined bromide sample

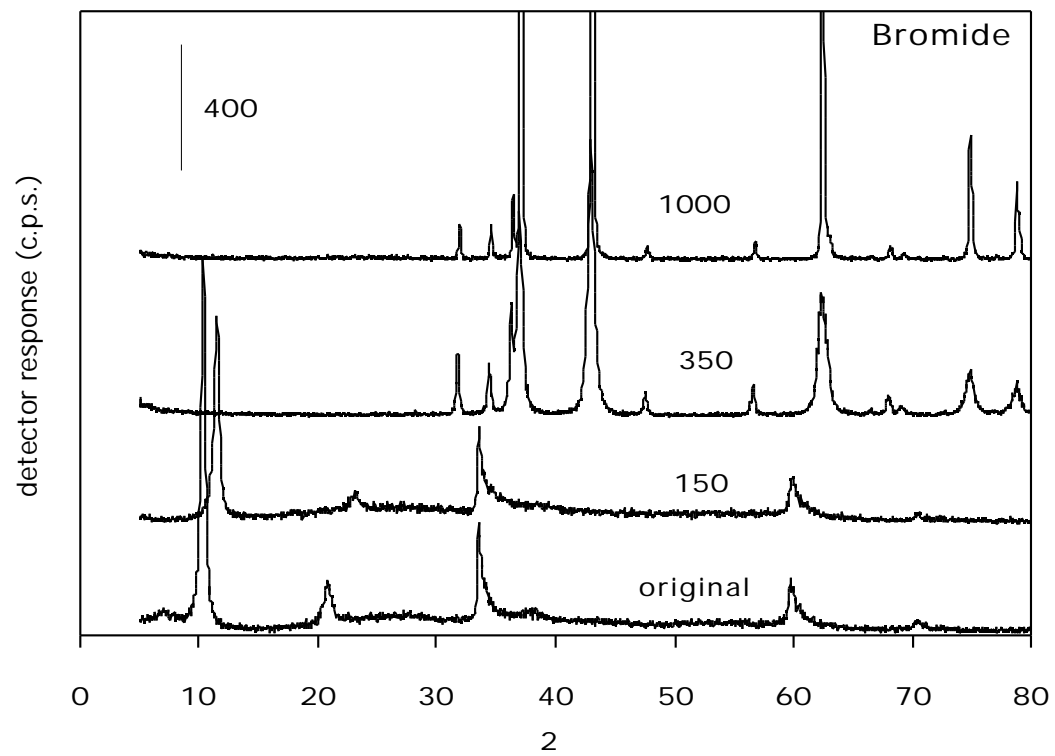

## Powder X-ray diffraction patterns of calcined carbonate sample

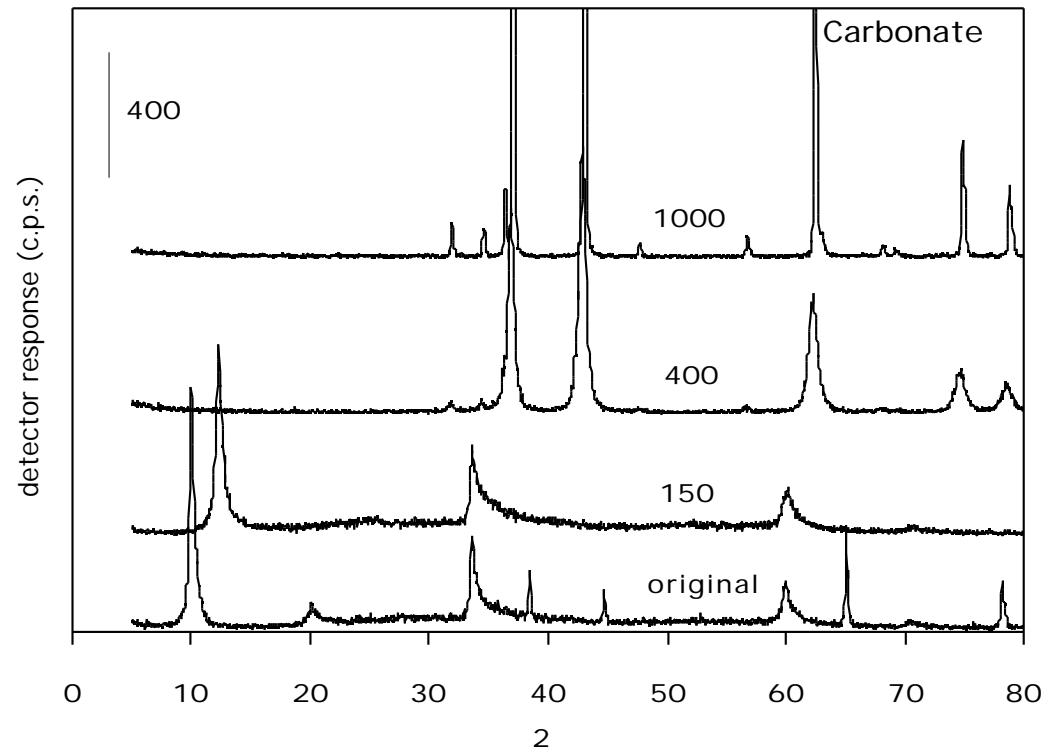

## Powder X-ray diffraction patterns of calcined nitrate sample

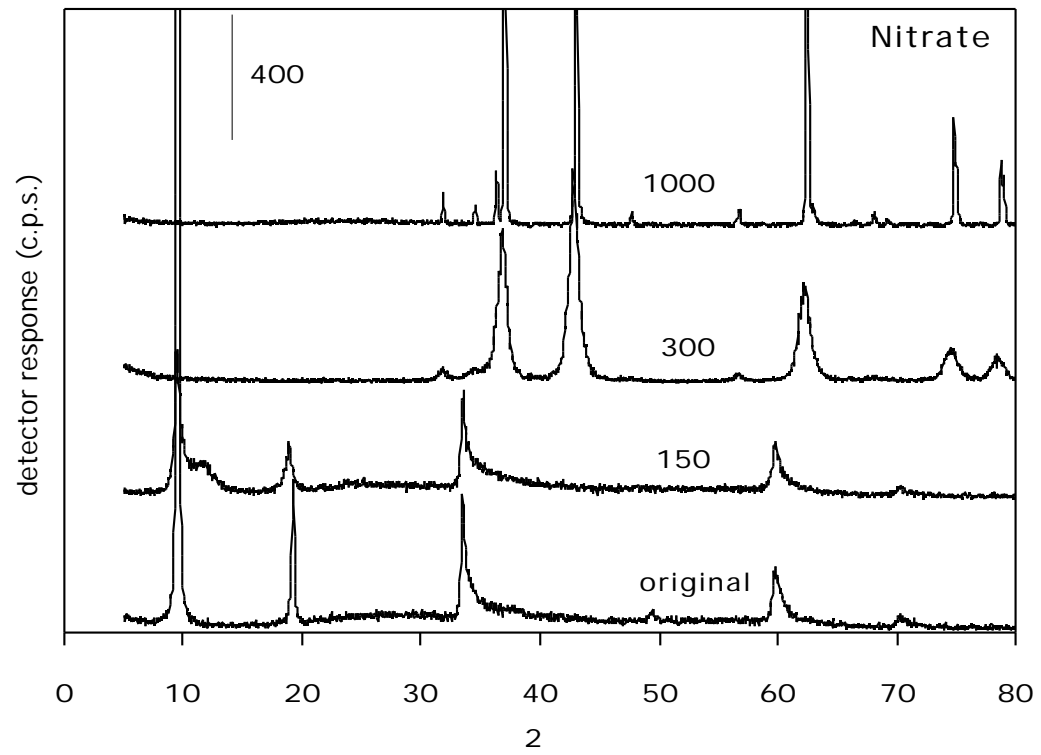

Supplement: b110145e.pdf [file b110145e.pdf]
